# Supplementary material for: A layer-built rechargeable lithium ribbon-type battery for high energy density textile battery applications
Source: Royal Society of Chemistry journal article supplement (doi:10.1039/c3ta14197g), 2013-12-13
Supplement: c3ta14197g.pdf [file c3ta14197g.pdf]

## Supplementary Information

# A Layer-Built Rechargeable Lithium Ribbon-Type Battery for High Energy Density Textile Battery

Jae-Kwang Kim,<sup>a,b\*</sup> Johan Scheers,<sup>b</sup> Ho-Suk Ryu,<sup>c</sup> Jou-Hyeon Ahn,<sup>a\*</sup> Tae-Hyun Nam,<sup>c</sup> Ki-Won Kim,<sup>c</sup>  
Hyo-Jun Ahn,<sup>c</sup> and Gyu-Bong Cho,<sup>c\*</sup> and Per Jacobsson<sup>b</sup>

<sup>a</sup>Department of Chemical & Biological Engineering and Research Institute for Green Energy  
Convergence Technology, Gyeongsang National University, 900, Gajwa-dong, Jinju 660-701, Republic  
of Korea

<sup>b</sup>Department of Applied Physics, Chalmers University of Technology, SE-41296 Göteborg, Sweden

<sup>c</sup>School of Materials Science and Engineering, Gyeongsang National University,  
900, Gajwa-dong, Jinju 660-701, Republic of Korea

\* Corresponding author: jaekwang@chalmers.se (J.-K. Kim); [jhahn@gnu.ac.kr](mailto:jhahn@gnu.ac.kr) (J-H. Ahn);  
[chogb@gnu.ac.kr](mailto:chogb@gnu.ac.kr) (G.-B. Cho)

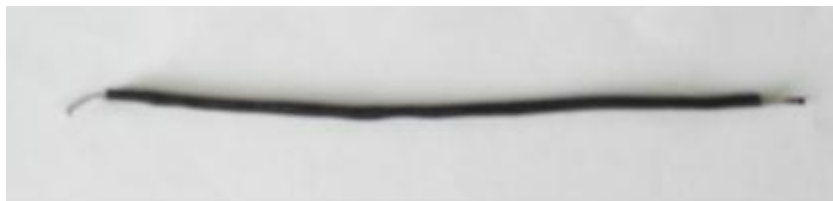

**Figure S1.** 1 mm wide, 10 cm long and 1 mm thickness wire battery.

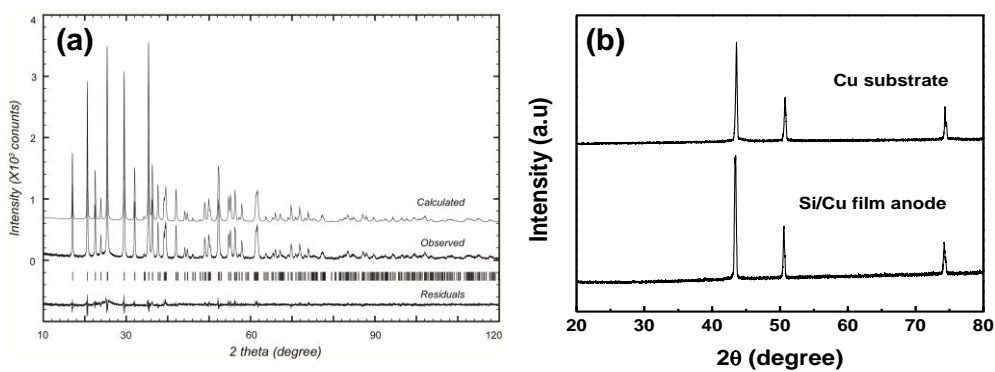

**Figure S2.** X-ray diffraction pattern and Rietveld refined results of a)  $\text{LiFePO}_4$  and b) the amorphous silicon film.

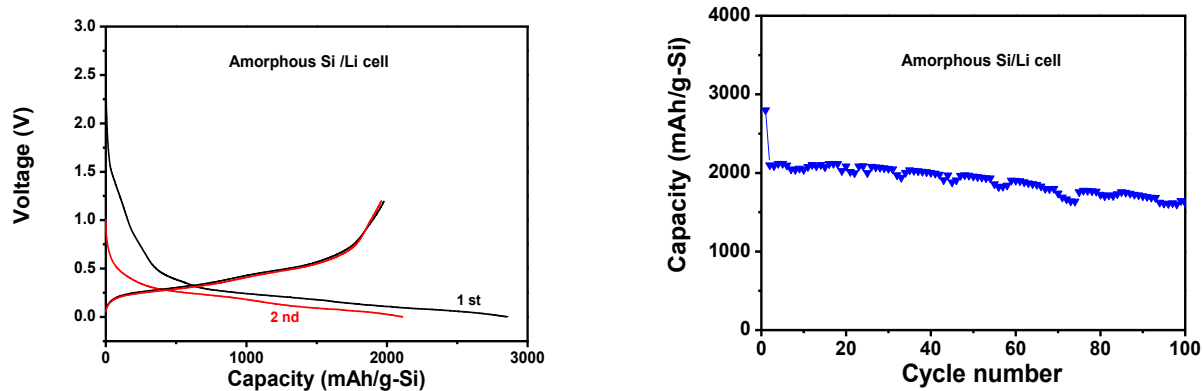

**Figure S3.** Charge–discharge curves at the first and second cycles (left), and cycling performance, of the amorphous Si/Li batteries at 0.5 C (RT).

Table S1: Rietveld refinement results for  $\text{LiFePO}_4$ .

| Sample code | $\text{LiFePO}_4/\text{S}$ |           |
|-------------|----------------------------|-----------|
| Li          | x                          | 0         |
|             | y                          | 0         |
|             | z                          | 0         |
| Fe          | x                          | 0.2817(1) |
|             | y                          | 0.25      |
|             | z                          | 0.9330(4) |
| P           | x                          | 0.0949(3) |
|             | y                          | 0.25      |

|    |   |           |
|----|---|-----------|
|    | z | 0.4206(6) |
| O1 | x | 0.0930(7) |
|    | y | 0.25      |
|    | z | 0.741(1)  |
| O2 | x | 0.4547(7) |
|    | y | 0.25      |
|    | z | 0.209(1)  |
| O3 | x | 0.1645(5) |
|    | y | 0.0507(7) |
|    | z | 0.2832(7) |

Table S2. The bond angles and bond distances in LiO<sub>6</sub>, FeO<sub>6</sub> and PO<sub>4</sub> polyhedra.

| Sample code |                          | LFP/S     |
|-------------|--------------------------|-----------|
| Distances   | ( Li )-( O1 ) x 2        | 2.157(5)  |
|             | ( Li )-( O2 ) x 2        | 2.082(3)  |
|             | ( Li )-( O3 ) x 2        | 2.178(5)  |
| Li          | ( O1 )-( Li )-( O2 ) x 2 | 88.2(3)   |
|             | ( O1 )-( Li )-( O2 ) x 2 | 91.82(17) |
|             | ( O1 )-( Li )-( O3 ) x 2 | 84.3(3)   |
|             | ( O1 )-( Li )-( O3 ) x 2 | 95.7(4)   |
|             | ( O2 )-( Li )-( O3 ) x 2 | 70.9(3)   |
|             | ( O2 )-( Li )-( O3 ) x 2 | 109.1(3)  |

| Sample code |                          | LFP/S    |
|-------------|--------------------------|----------|
|             | ( Fe )-( O1 )            | 2.229(8) |
|             | ( Fe )-( O2 )            | 2.101(7) |
|             | ( Fe )-( O3 ) x 2        | 2.238(5) |
|             | ( Fe )-( O3 ) x 2        | 2.088(5) |
|             | ( O1 )-( Fe )-( O2 )     | 177.4(6) |
|             | ( O1 )-( Fe )-( O3 ) x 2 | 81.2(3)  |
| <b>Fe</b>   | ( O1 )-( Fe )-( O3 ) x 2 | 91.3(4)  |
|             | ( O2 )-( Fe )-( O3 ) x 2 | 96.6(4)  |
|             | ( O2 )-( Fe )-( O3 ) x 2 | 90.0(3)  |
|             | ( O3 )-( Fe )-( O3 ) x 2 | 87.6(3)  |
|             | ( O3 )-( Fe )-( O3 ) x 2 | 152.0(4) |
|             | ( O3 )-( Fe )-( O3 )     | 64.6(3)  |
|             | ( O3 )-( Fe )-( O3 )     | 119.7(4) |
| Sample code |                          | LFP/S    |
|             | ( P )-( O1 )             | 1.504(5) |
|             | ( P )-( O2 )             | 1.568(8) |
| <b>P</b>    | ( P )-( O3 ) x 2         | 1.537(5) |
|             | ( O1 )-( P )-( O2 )      | 112.1(6) |
|             | ( O1 )-( P )-( O3 ) x 2  | 115.2(5) |
|             | ( O2 )-( P )-( O3 ) x 2  | 105.5(6) |
|             | ( O3 )-( P )-( O3 )      | 102.1(5) |
